# Supplementary material for: Characterization of NS5A and NS5B Resistance-Associated Substitutions from Genotype 1 Hepatitis C Virus Infected Patients in a Portuguese Cohort
Source: MDPI journal article supplement (doi:10.3390/v10050223), 2018-04-26
Supplement: s1 [file s1]

## Supplementary Materials:

**Table S1.** Primers for RT-PCR/cDNA synthesis (outer PCR), nested PCR (inner PCR) and sequencing of HCV NS5 coding region.

| Primer name | Purpose                                                                   | Direction | Primer sequence (5'- 3') | Location (reference H77) (bp) | GC content | Average Tm |
|-------------|---------------------------------------------------------------------------|-----------|--------------------------|-------------------------------|------------|------------|
| FW1PCR      | RT-PCR NS5A-NS5B region                                                   | Sense     | GTCGTCACBAGYACCTGG       | 5311 - 5328                   | 62%        | 56°C       |
| RV1PCR      | RT-PCR NS5A-NS5B region                                                   | Antisense | GAGACASGCTGTGATAWATG     | 9297 - 9316                   | 45%        | 51°C       |
| FW2PCR      | Nested PCR NS5A-NS5B region / Sequencing NS5A-NS5B region –Back-up option | Sense     | GTGGTCATHGTRGGYAGG       | 5386 - 5403                   | 57%        | 53°C       |
| RV2PCR      | Nested PCR NS5A-NS5B region / Sequencing NS5A-NS5B region                 | Antisense | CCCTATTGATYTCACCTGG      | 9055 - 9073                   | 50%        | 51°C       |
| FW1         | Sequencing NS5A-NS5B region                                               | Sense     | GCHGTGCARTGGATGAA        | 6118 - 6134                   | 52%        | 53°C       |
| RV1         | Sequencing NS5A-NS5B region –Back-up option                               | Antisense | CCRTTYTGTACATGTCC        | 6493 - 6509                   | 50%        | 49°C       |
| FW2         | Sequencing NS5A-NS5B region –Back-up option                               | Sense     | TGGMGRGARGAGATG          | 7093 - 7107                   | 57%        | 49°C       |
| RV2         | Sequencing NS5A-NS5B region –Back-up option                               | Antisense | GGRTCRGTRAGCATGGA        | 6901 - 6917                   | 56%        | 53°C       |
| FW3         | Sequencing NS5A-NS5B region –Back-up option                               | Sense     | TCYTCYATGCCCCCYCT        | 7559 - 7574                   | 62%        | 57°C       |
| RV3         | Sequencing NS5A-NS5B region –Back-up option                               | Antisense | TTRTTYTCYGACTCMAC        | 7126 - 7142                   | 41%        | 46°C       |
| FW4         | Sequencing NS5A-NS5B region                                               | Sense     | AARGTCACHTTTGACAG        | 7816 - 7832                   | 40%        | 46°C       |
| RV4         | Sequencing NS5A-NS5B region                                               | Antisense | GCBGARTGYGGGGCGTCAG      | 7936 - 7955                   | 73%        | 65°C       |
| FW5         | Sequencing NS5A-NS5B region                                               | Sense     | AAGCCAGCTCGYCTYATCGT     | 8128 - 8147                   | 55%        | 59°C       |
| RV5         | Sequencing NS5A-NS5B region –Back-up option                               | Antisense | ACGAGCATBTGTCAGTC        | 8593 - 8609                   | 60%        | 55°C       |
| FW6         | Sequencing NS5A-NS5B region                                               | Sense     | CTTCACGGAGGCTATGAC       | 8679 - 8696                   | 56%        | 52°C       |
| RV6         | Sequencing NS5A-NS5B region                                               | Antisense | GACCADGAYCCGTCRCT        | 7606 - 7619                   | 61%        | 55°C       |
| FW7         | Sequencing NS5A-NS5B region –Back-up option                               | Sense     | TYTACCARTGYTGTGAC        | 8381 - 8397                   | 44%        | 48°C       |
| 1bRV7       | Sequencing GT1b NS5A-NS5B region                                          | Antisense | CATCTCCTGCCGCCACA        | 7067 - 7083                   | 65%        | 58°C       |
| 1aFW8       | Sequencing GT1a NS5A-NS5B region                                          | Sense     | ACACTCGCTGCCVCTGTG       | 6433 - 6450                   | 65%        | 60°C       |
| 1bRV8       | Sequencing GT1b NS5A-NS5B region –Back-up option                          | Antisense | AGGTCAAGTGGC TCAATGGA    | 8987 - 9004                   | 50%        | 56°C       |
| 1aFW9       | Sequencing GT1a NS5A-NS5B region –Back-up option                          | Sense     | CTTCACGGAGGCTATGACC      | 8636 - 8654                   | 58%        | 55°C       |
| RV9         | Sequencing NS5A-NS5B region                                               | Antisense | ACGATRAGRRCGAGCTGGCTT    | 8083 - 8102                   | 55%        | 59°C       |
| 1aFW10      | Sequencing GT1a NS5A-NS5B region –Back-up option                          | Sense     | GACAGCAAGACA CACTCC      | 8816 - 8833                   | 56%        | 53°C       |
| 1bFW11      | Sequencing GT1b NS5A-NS5B region –Back-up option                          | Sense     | AACTCCTGGCTAGGCAACAT     | 8848 - 8867                   | 50%        | 56°C       |
